# Supplementary material for: c-Met and EPHA7 Receptor Tyrosine Kinases Are Related to Prognosis in Clear Cell Renal Cell Carcinoma: Focusing on the Association with Myoferlin Expression
Source: MDPI journal article supplement (doi:10.3390/cancers14041095), 2022-02-21
Supplement: s1 [file s1]

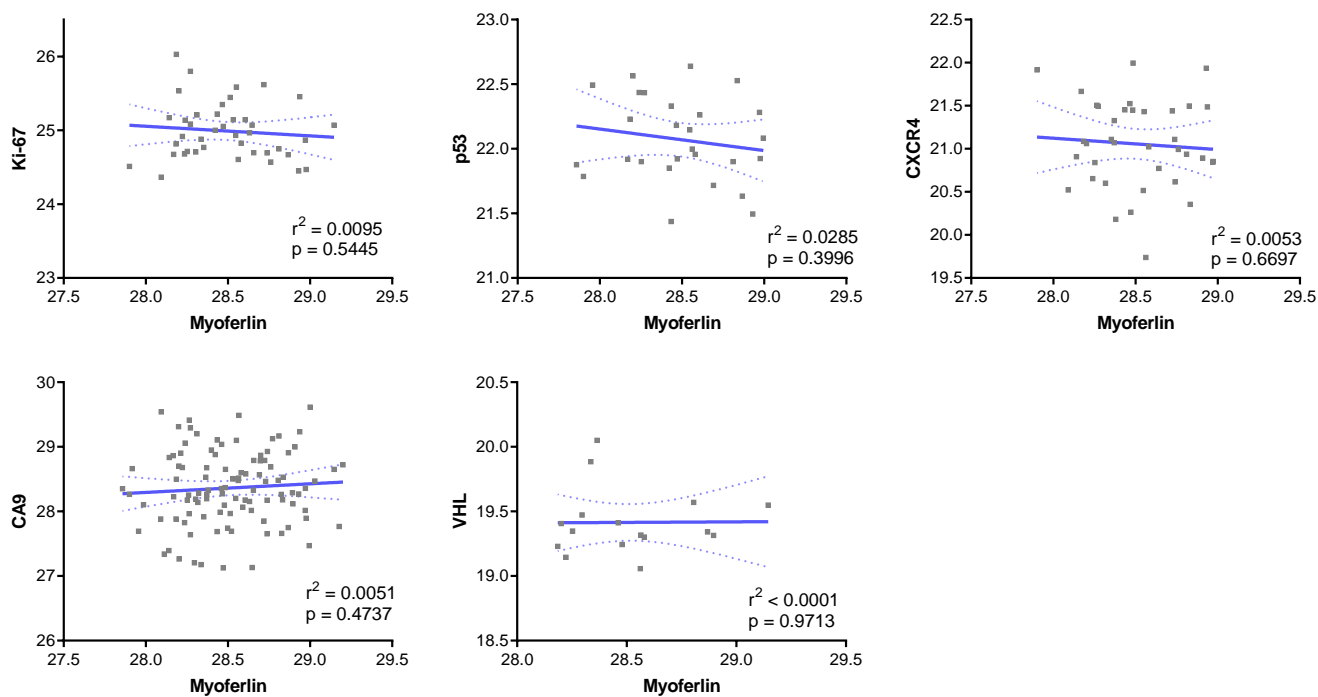

**Figure S1.** Selected non-RTK proteins identified in the ccRCC proteomic dataset and their correlation with myoferlin. Dotted lines denote the 95% confidence interval of Pearson's correlation.
